# Supplementary material for: Aberrant calcium channel splicing drives defects in cortical differentiation in Timothy syndrome
Source: eLife. 2019 Dec 23;8:e51037. doi: 10.7554/eLife.51037 (PMC6964969; doi:10.7554/eLife.51037)
Supplement: Figure 1—figure supplement 1—source data 1. [file elife-51037-fig1-figsupp1-data1.xlsx]

## Sheet: Supp Fig 1a
		Pax6			Nestin			Gad67
	E11	0.11958	0.0689191	0.0764224	0.0782082	0.0429682	0.0561498	0.000841359	0.000529254	0.000847821
	E14	0.12076	0.110086	0.124579	0.0928279	0.0839108	0.0996147	0.00283203	0.000847824	0.00161985
	E18	0.0472094	0.0507661	0.0153057	0.0288947	0.0540884	0.0155084	0.0487083	0.0417032	0.019604
	P1	0.0190489	0.0167469	0.021434	0.0248898	0.0112095	0.0239319	0.103667	0.161606	0.0638148
	P7	0.00492737	0.00366294	0.00602426	0.00477734	0.00342772	0.00543406	0.0564043	0.0370422	0.0495788
	P14	0.00347373	0.00231469	0.00423243	0.00179812	0.00281102	0.00270178	0.0957224	0.0722969	0.0715457
	P21	0.00354757	0.00268822	0.00376196	0.000530635	0.000601202	0.000731584	0.119505	0.122475	0.126772
	adult (6mo)	0.004104	0.00386817	0.00506605	0.00140074	0.00106973	0.00159539	0.140636	0.106302	0.153369
	Supp Fig 1a: Quantitative RT-PCR quality controls on microdissected rostral cortex across embryonic and postnatal brain development.

## Sheet: Supp Fig 1d
	E11	E14	E18	P1	P7	P14	P21	adult
	4.67447	3.22361	0.629687	0.205063	0.129602	0.101948	0.137537	0.132179
	15.9396	3.27122	0.703662	0.223968	0.128701	0.116698	0.14536	0.141053
	14.5874	2.80954	0.651341	0.212508	0.153975	0.125773	0.144322	0.135517
	Supp Fig 1d: The ratio of Cacna1c exon 8A to exon 8 progressively decreases in the developing cortex over the course of embryonic development.

## Sheet: Supp Fig 1e
	E18 EXON8	E18 EXON8A
	8.81973e-06	6.0229e-05		Supp Fig 1e: Single cell qRT-PCR using Fluidigm dynamic arrays reveals elevated levels of exon 8A at the single cell level at embryonic day 18 (E18) as compared to exon 8.
	7.56239e-06	5.71975e-05
	1.06927e-05	4.3376e-05
	5.317e-06	5.28838e-05
	1.2817e-05	5.52714e-05
	1.03216e-05	4.70548e-05
	8.84617e-06	5.23855e-05
	4.64508e-06	5.3751e-05
	2.60531e-05	8.20279e-05
	1.43047e-05	5.80204e-05
	1.24035e-05	5.77618e-05
	0	0
	1.12969e-05	4.88584e-05
	1.90896e-05	4.83405e-05
	0.00169849	0.0101672
	5.14938e-06	4.96286e-05
	1.10046e-05	6.2082e-05
	1.14174e-05	5.53231e-05
	1.73781e-05	5.65978e-05
	1.25805e-05	6.3807e-05
	5.1901e-06	4.42941e-05
	1.23091e-05	5.41248e-05
	1.5099e-05	4.21172e-05
	0	0
	1.18651e-05	4.86358e-05
	1.09171e-05	4.41441e-05
	6.37764e-06	4.94702e-05
	1.75407e-05	4.30688e-05
	1.43834e-05	5.33503e-05
	1.21018e-05	5.57457e-05
	1.09543e-05	5.57378e-05
	1.20696e-05	4.10943e-05
	8.03125e-06	4.74937e-05
	1.11025e-05	5.20332e-05
	8.52196e-06	5.39267e-05
	0	1.23104e-08
	8.24105e-06	4.1105e-05
	8.05363e-06	4.41249e-05
	6.52336e-06	4.01414e-05
	1.65697e-05	5.92116e-05
	8.0349e-06	6.17482e-05
	5.76867e-06	4.16653e-05
	1.62567e-05	5.74828e-05
	1.31033e-05	3.54998e-05
	1.25002e-05	4.45915e-05
	1.60328e-05	4.48297e-05
	8.45787e-06	4.20248e-05
	2.18296e-07	2.52085e-08
	6.34884e-06	4.63396e-05
	5.67361e-06	4.12779e-05
	5.48816e-06	4.35347e-05
	1.21499e-05	3.43182e-05
	1.25917e-05	4.66894e-05
	8.28893e-06	5.40449e-05
	6.03101e-06	3.91522e-05
	1.85433e-05	5.43908e-05
	1.44733e-05	6.36472e-05
	1.48025e-05	5.62371e-05
	1.02574e-05	5.1142e-05
	7.59313e-07	5.29495e-09
	1.01463e-05	4.91779e-05
	1.4881e-05	4.41654e-05
	9.36931e-06	4.80946e-05
	8.28265e-06	5.33592e-05
	7.00415e-06	5.20336e-05
	1.69241e-05	4.59167e-05
	9.22439e-06	5.7797e-05
	9.74084e-06	5.34989e-05
	1.02044e-05	6.60665e-05
	1.15183e-05	4.71228e-05
	1.41526e-05	4.93646e-05
	1.28663e-05	4.83378e-05
	7.84154e-06	4.54059e-05
	9.85661e-06	5.1868e-05
	1.03865e-05	4.89077e-05
	6.71422e-06	4.30425e-05
	8.36219e-06	5.67942e-05
	1.10752e-05	5.91556e-05
	5.86878e-06	5.76019e-05
	6.51738e-06	5.02282e-05
	1.48099e-05	5.99567e-05
	4.24046e-06	4.47212e-05
	6.20217e-06	4.33346e-05
	1.21043e-05	5.90154e-05
	7.02671e-06	4.68799e-05
	9.06132e-06	5.74589e-05
	1.3628e-05	6.04205e-05
	8.98176e-06	5.67198e-05
	9.23762e-06	5.14797e-05
	1.08408e-05	6.0141e-05
	6.94868e-06	6.02545e-05

## Sheet: Supp Fig 1f
	P14 EXON8	P14 EXON8A
	1.41893e-05	8.29906e-07		Supp Fig 1f: By P14, the abundance of exon 8A in Cacna1c transcripts at the single cell level is dramatically reduced.
	5.73634e-06	7.07854e-07
	1.67623e-05	3.55999e-07
	1.26199e-05	5.69831e-07
	1.34094e-05	1.11322e-06
	7.08959e-06	1.89348e-08
	1.77989e-05	1.37432e-07
	2.14018e-05	4.37881e-07
	9.3839e-06	1.49367e-07
	6.72935e-06	8.48083e-07
	1.38037e-05	1.87622e-06
	1.30862e-05	8.34617e-07
	6.6736e-06	3.02814e-08
	7.32886e-06	1.85249e-06
	1.14714e-05	3.17621e-07
	1.15261e-05	1.13302e-06
	2.28052e-05	1.08221e-06
	1.45352e-05	1.68285e-06
	1.69603e-05	9.37711e-07
	1.12157e-05	9.82256e-07
	1.12958e-05	1.66928e-06
	1.52594e-05	1.68298e-07
	1.02516e-05	5.86747e-07
	5.1681e-05	4.20351e-05
	1.31402e-05	2.48842e-07
	1.72136e-05	6.20667e-07
	9.74842e-06	7.80252e-07
	1.21789e-05	3.17614e-07
	9.40747e-06	5.56217e-07
	1.65639e-05	9.40872e-07
	8.7509e-06	7.59074e-07
	1.34869e-05	7.67794e-07
	1.52495e-05	9.33264e-08
	3.16818e-06	1.1448e-06
	1.48666e-05	3.15275e-07
	1.20195e-05	7.88106e-06
	1.28594e-05	1.00502e-06
	1.26691e-05	4.74163e-07
	1.06663e-05	3.6175e-07
	1.26292e-05	8.08548e-07
	8.51302e-06	4.03374e-07
	1.76483e-05	4.22516e-07
	9.71936e-06	5.20487e-07
	9.54053e-06	1.62183e-07
	1.47291e-05	9.57181e-07
	1.21601e-05	4.8365e-07
	7.11419e-06	1.85757e-07
	1.58086e-06	1.07784e-06
	7.37264e-06	0
	1.32485e-05	1.127e-06
	1.64535e-05	8.64874e-07
	1.63232e-05	2.17007e-07
	1.33689e-05	4.10236e-07
	1.19617e-05	3.75339e-07
	1.75439e-05	7.87318e-07
	7.87649e-06	6.77547e-07
	6.57432e-06	7.92851e-07
	1.46485e-05	7.14936e-07
	1.54212e-05	8.60721e-07
	3.34455e-07	2.07156e-07
	1.76119e-05	8.92815e-07
	8.79717e-06	2.72178e-07
	1.44154e-05	1.98326e-06
	1.18319e-05	1.78851e-07
	5.98876e-06	8.17638e-07
	2.198e-05	4.28422e-07
	1.40563e-05	2.59565e-07
	1.47358e-05	1.24551e-06
	1.51705e-05	1.36519e-06
	1.30189e-05	1.36925e-07
	1.75152e-05	6.98512e-08
	1.07595e-05	9.29538e-07
	1.79711e-05	1.43265e-06
	1.58862e-05	4.9287e-07
	8.16783e-06	1.7266e-06
	5.23161e-06	5.84114e-07
	1.54054e-05	3.06322e-07
	1.45975e-05	7.35605e-07
	1.08246e-05	9.62448e-07
	1.12749e-05	4.64402e-07
	1.07951e-05	6.15912e-07
	1.85706e-05	3.59829e-07
	1.59181e-05	2.39409e-07
	1.66298e-05	1.69881e-06
	2.07758e-05	1.15287e-06
	1.70124e-05	7.65531e-07
	1.47141e-05	2.80475e-07
	7.13565e-06	2.74965e-07
	1.95792e-05	9.59515e-07
	1.62276e-05	1.27115e-06
	1.59046e-05	1.30706e-06

## Sheet: Supp Fig 1i
		EXON 8A		EXON 8
	GW12-14	0.001188	0.00107072	0.0013519	0.00114985
	GW22-26	0.00283151	0.00210839	0.0039732	0.00440828
	adult (27y)	0.000706297		0.00208703
	Supp Fig 1i: qRT-PCR on RNA from human fetal cortex at two different embryonic time points and in adult frontal cortex shows that exon 8 is upregulated as fetal cortical development progresses.

## Sheet: Supp Fig 1j
	NPC ratio 8A/8			neurons ratio 8A/8
	1.44227	control		0.203889	control
	1.08087	control		0.0952912	control
	2.42742	control		0.533751	control
	1.42319	control		0.287605	control
	6.44361	TS		0.0956759	control
	6.13142	TS		1.8678	TS
	9.91958	TS		0.981635	TS
	3.46216	TS		0.580662	TS
				0.401409	TS
	Supp Fig 1j: The ratio of CACNA1C exon 8A to exon 8 in differentiating human NPCs in all control and TS lines at the NPC and neuron stages.
