# Supplementary material for: Aberrant calcium channel splicing drives defects in cortical differentiation in Timothy syndrome
Source: eLife. 2019 Dec 23;8:e51037. doi: 10.7554/eLife.51037 (PMC6964969; doi:10.7554/eLife.51037)
Supplement: Figure 1—source data 1. [file elife-51037-fig1-data1.xlsx]

## Sheet: Figure 1a
		EXON 8A			EXON 8
	E11	0.001788	0.00057271	0.00064263	0.000382503	3.593e-05	4.40537e-05
	E14	0.0016339	0.0012075	0.00152909	0.000506855	0.000369128	0.000544249
	E18	0.00226343	0.00221668	0.00133092	0.00347503	0.00352029	0.00189141
	P1	0.00177461	0.00129668	0.0019762	0.00865396	0.00610179	0.0088236
	P7	0.000979062	0.00075053	0.00122895	0.00755437	0.00583156	0.00798153
	P14	0.000448658	0.00054261	0.000625921	0.00440084	0.00464968	0.00497659
	P21	0.000641575	0.000595751	0.000713599	0.00466475	0.00409847	0.00494449
	adult (6mo)	0.00061658	0.000576235	0.00048484	0.00466475	0.00408523	0.00357771
	Figure 1a: qRT-PCR quantifying relative abundance of Cacna1c exons 8 and 8A in developing mouse cortex

## Sheet: Figure 1c
		EXON 8A					EXON 8
	control IPSC-NPCs	0.000146612	0.000383177	0.000133897	0.000216411		0.000101654	0.000369172	5.93672e-05	0.000173375
	control IPSC-neurons	0.000132366	8.65455e-05	0.000113783	0.000147371	0.000121898	0.000637332	0.000769237	0.000213808	0.000628343	0.00137384
	Figure 1c: qRT-PCR on RNA from differentiating human iPSC-derived control NPCs and neurons

## Sheet: Figure 1d
		EXON 8A				EXON 8
	TS IPSC-NPCs	0.000324516	0.000198028	0.000926995	0.00030224	6.16898e-05	3.22092e-05	9.07657e-05	8.72982e-05
	TS IPSC-neurons	0.000303792	0.000149072	0.000188959	0.000175104	0.00018721	0.000162158	0.000361548	0.00085381
	Figure 1d: qRT-PCR on RNA from differentiating human TS iPSC-derived NPCs or neurons

## Sheet: Figure 1e
		exon 8A		exon 8
	control 1 (H9)	0.000146612		0.000101654
	control 2 (IM23-9)	0.000383177		0.000377412
	control 3 (NH1-1)	0.000162594	0.000105199	8.21517e-05	3.65827e-05
	control 3 (NH2-6)	0.000138163	0.000294659	9.89703e-05	0.000247779
	TS1 (1540-5)	0.000333544	0.000315489	8.88993e-05	3.44803e-05
	TS1 (1540-7)	0.000307117	8.89391e-05	3.41727e-05	3.02457e-05
	TS1 (1540-32)	0.000204999	0.00164899	2.14887e-05	0.000160043
	TS2 (2055-42)	0.00030224		8.72982e-05
	Figure 1e: Relative abundance of CACNA1C exons 8 and 8A in individual differentiations from iPSC-NPC lines

## Sheet: Figure 1f
	control NPCs	TS NPCs	control neurons	TS neurons
	1.44227	6.44361	0.203889	1.8678
	1.08087	6.13142	0.0952912	0.981635
	2.42742	9.91958	0.533751	0.580662
	1.42319	3.46216	0.287605	0.401409
			0.0956759
	Figure 1f: Ratio of exon 8A/8 in human iPSC-derived cells

## Sheet: Figure 1h
	control neurons	TS-neurons
	44.44	38.2
	45.24	39.4
	28.95	32.6
	Figure 1h: Percentage of NCAM+ neurons in TS and control iPSC-neurons, as assessed by single-cell Fluidigm arrays
