# Supplementary material for: Aberrant calcium channel splicing drives defects in cortical differentiation in Timothy syndrome
Source: eLife. 2019 Dec 23;8:e51037. doi: 10.7554/eLife.51037 (PMC6964969; doi:10.7554/eLife.51037)
Supplement: Figure 2—source data 1. [file elife-51037-fig2-data1.xlsx]

## Sheet: Fig 2i
		pCAGIG control						pCAGIG-CaV1.2-8GR							pCAGIG-CaV1.2-8GR-4EQ
	%CTIP2+/GFP+	32.304	15.3558	20.3065	23.1746	21.1957	4.31655	43.2584	52.907	39.0698	39.2045	44.3609	41.0714	32.7778	31.3433	16.895
	%SATB2+/GFP+	57.7197	75.2809	69.3487	64.127	63.587	89.2086	48.8764	26.1628	43.2558	43.1818	48.4962	50.3571	57.2222	57.4627	76.2557
	%CTIP2-SATB2+/GFP+	8.7886	6.74157	6.89655	11.4286	13.0435	5.7554	6.17978	16.2791	14.4186	15.9091	6.76692	6.78571	8.33333	7.83582	9.13242
	Figure 2i: Introducing TS-Cav1.2 in utero results in calcium-dependent alterations in the proportion of SATB2- and CTIP2-expressing EGFP+ cells.
	(IRES-GFP, n=6 mice, 1587 cells; TS-Cav1.2, n=6 mice, 1287 cells; TS-4EQ-Cav1.2, n=3 mice, 708 cells)

## Sheet: Fig 2n
		pCAGIG				pCAGIG-CaV1.2-8GR					pCAGIG-CaV1.2-8GR-4EQ
	%PAX6+/GFP+	50	45.977	38.0435	30	35.0962	41.3793	44.5378	45.2381	32.3308	48	41.629
	%TBR2+/GFP+	46.9697	47.7011	52.5362	51.4286	54.8077	55.1724	50.8403	47.619	66.1654	44	52.9412
	%PAX6-TBR2+/GFP+	3.0303	6.32184	9.42029	4.28571	10.0962	4.02299	4.62185	5.2381	1.50376	4.8	6.78733
	Figure 2n: Introducing TS-Cav1.2 in utero does not alter the distribution of NPC subtypes in the VZ/SVZ.
	(IRES-GFP, n=4 mice, 722 cells; TS-Cav1.2, n=4 mice, 830 cells; TS-4EQ-Cav1.2, n=3 mice, 479 cells)
