# Supplementary material for: Aberrant calcium channel splicing drives defects in cortical differentiation in Timothy syndrome
Source: eLife. 2019 Dec 23;8:e51037. doi: 10.7554/eLife.51037 (PMC6964969; doi:10.7554/eLife.51037)
Supplement: Figure 3—source data 1. [file elife-51037-fig3-data1.xlsx]

## Sheet: Fig 3d
		pCAGIG-CaV1.2-8TY									pCAGIG-CaV1.2-8TY-4EQ
	%CTIP2+/GFP+	51.503	49.4792	35.5072	45.3704	45.8716	53.7037	36.6071	32.7759	19.8347	22.7273	29.2433	30.8998
	%SATB2+/GFP+	35.2705	30.7292	52.8986	45.3704	44.9541	36.1111	51.7857	60.8696	71.4876	70.202	59.9182	58.0645
	%CTIP2-SATB2+/GFP+	10.2204	10.4167	9.42029	7.40741	6.42202	7.40741	5.35714	6.68896	6.19835	5.55556	7.56646	9.50764
	Figure 3d: Introducing WT-Cav1.2 in utero results in a calcium-dependent increase in the relative abun-dance of SATB2-expressing EGFP+ cells and a commensurate reduction in CTIP2+ cells.
	(WT-4EQ-Cav1.2, n=5 mice, 1817 cells; WT-Cav1.2, n=7 mice, 1374 cells)

## Sheet: Fig 3h
		pCAGIG-CaV1.2-8TY-4EQ				pCAGIG-CaV1.2-8TY
	%PAX6+/GFP+	31.5152	56.6502	25.7669	47.4308	46.4435	46.5839	42.0792	44.7447
	%TBR2+/GFP+	58.1818	36.4532	72.3926	47.8261	46.4435	50.3106	55.4455	51.6517
	%PAX6-TBR2+/GFP+	10.303	6.89655	6.74847	4.74308	7.11297	3.10559	3.9604	3.3033
	Figure 3h: In utero expression of WT-Cav1.2 does not alter the relative abundance of NPC subtypes in the VZ/SVZ.
	(WT-4EQ-Cav1.2, n=4 mice, 987 cells; WT-Cav1.2, n=4 mice, 935 cells)
