# Supplementary material for: Aberrant calcium channel splicing drives defects in cortical differentiation in Timothy syndrome
Source: eLife. 2019 Dec 23;8:e51037. doi: 10.7554/eLife.51037 (PMC6964969; doi:10.7554/eLife.51037)
Supplement: Figure 4—source data 1. [file elife-51037-fig4-data1.xlsx]

## Sheet: Fig 4d
		+/+; cre:EGFP							flx/null; cre:EGFP				null/+; cre:EGFP
	%CTIP2+/GFP+	58.8235	53.5055	57.2549	60.1942	56.5476	65.3226	42.8571	43.6762	40.2597	40.566	48.3607	48.5366	44.7059	50.9804
	%SATB2+/GFP+	31.1765	37.2694	32.1569	35.9223	35.7143	26.6129	45.9627	48.0607	50.6493	40.566	47.9508	44.3902	46.5882	40.056
	%CTIP2-SATB2+/GFP+	9.11765	9.22509	6.27451	2.91262	6.54762	7.25807	4.34783	8.09444	4.7619	16.9811	3.27869	5.36585	8	7.28291
	Figure 4d: Cav1.2 loss of function results in reduced CTIP2-expressing EGFP+ cells with a concomitant increase in SATB2+ cells.
	(Cacna1c+/+, n=6 mice, 1261 cells; Cacna1c +/-, n=4 mice, 1436 cells; Cacna1c flx/-, n=4 mice, 1091 cells)

## Sheet: Fig 4f
	+/+; cre:EGFP	flx/null; cre:EGFP	null/+; cre:EGFP
	44.8276	33.6	38.9671
	46.1538	35.0515	39.4822
	44.7619	33.121	39.1304
	45.7711		34.9823
	Figure 4f: Cav1.2 loss of function results in a modest reduction in TBR1+ electroporated cells.
	(Cacna1c +/+, n=5 mice, 804 cells; Cacna1c +/-, n=4 mice, 1028 cells; Cacna1c flx/-, n=3 mice, 573 cells)
