# Supplementary figures and images for: Aberrant calcium channel splicing drives defects in cortical differentiation in Timothy syndrome
Source: eLife journal article supplement (doi:10.7554/elife.51037), 2019-12-23

**Figure 1 - figure supplement 1**

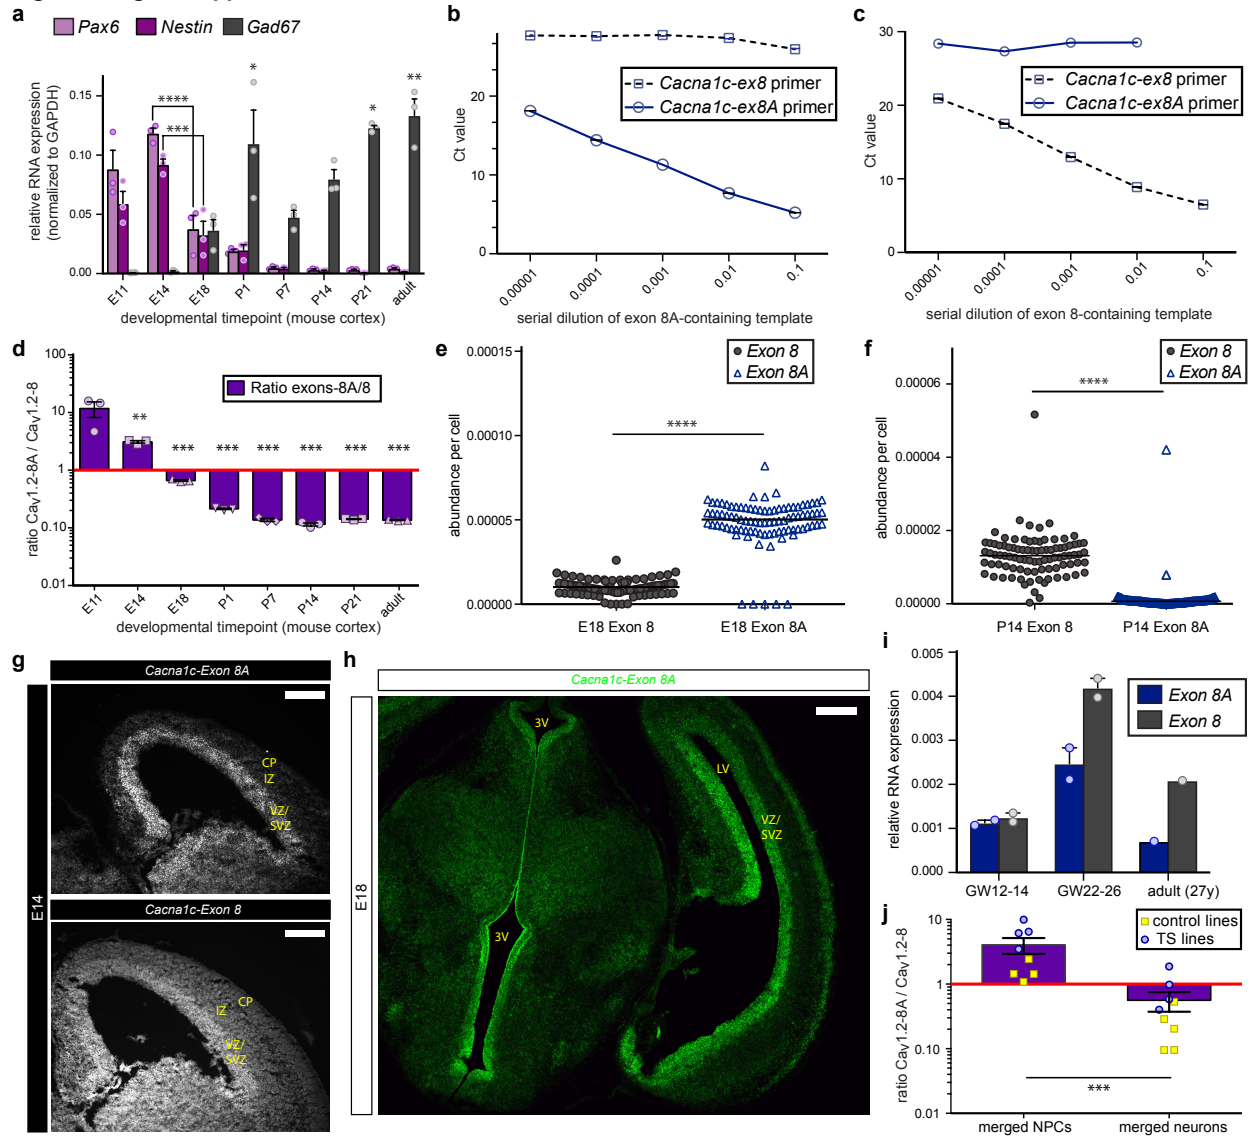

Supplement: supp [file elife-51037-supp-v1.zip]

Figure 4 - figure supplement 1

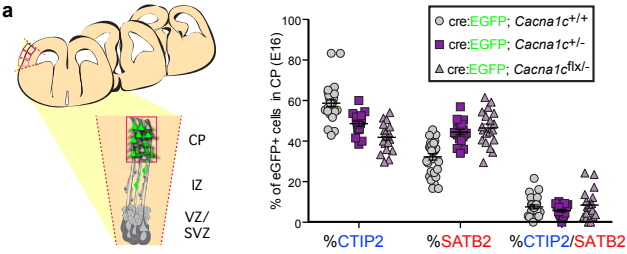

Supplement: supp [file elife-51037-supp-v1.zip]

**Figure 3 - figure supplement 1**

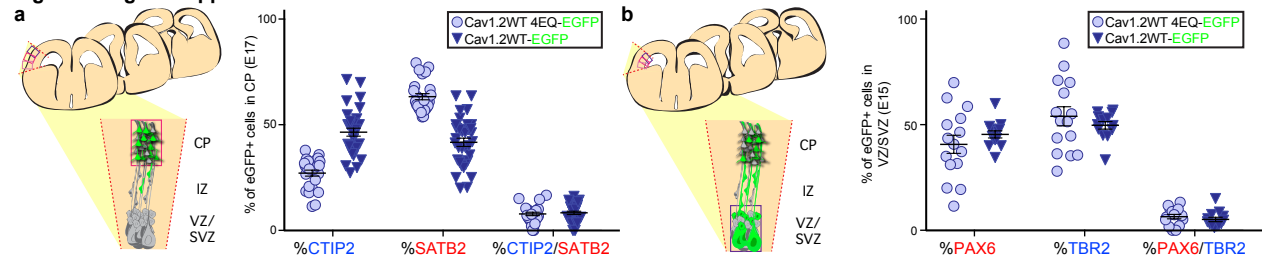

Supplement: supp [file elife-51037-supp-v1.zip]

**Figure 2 - figure supplement 1**

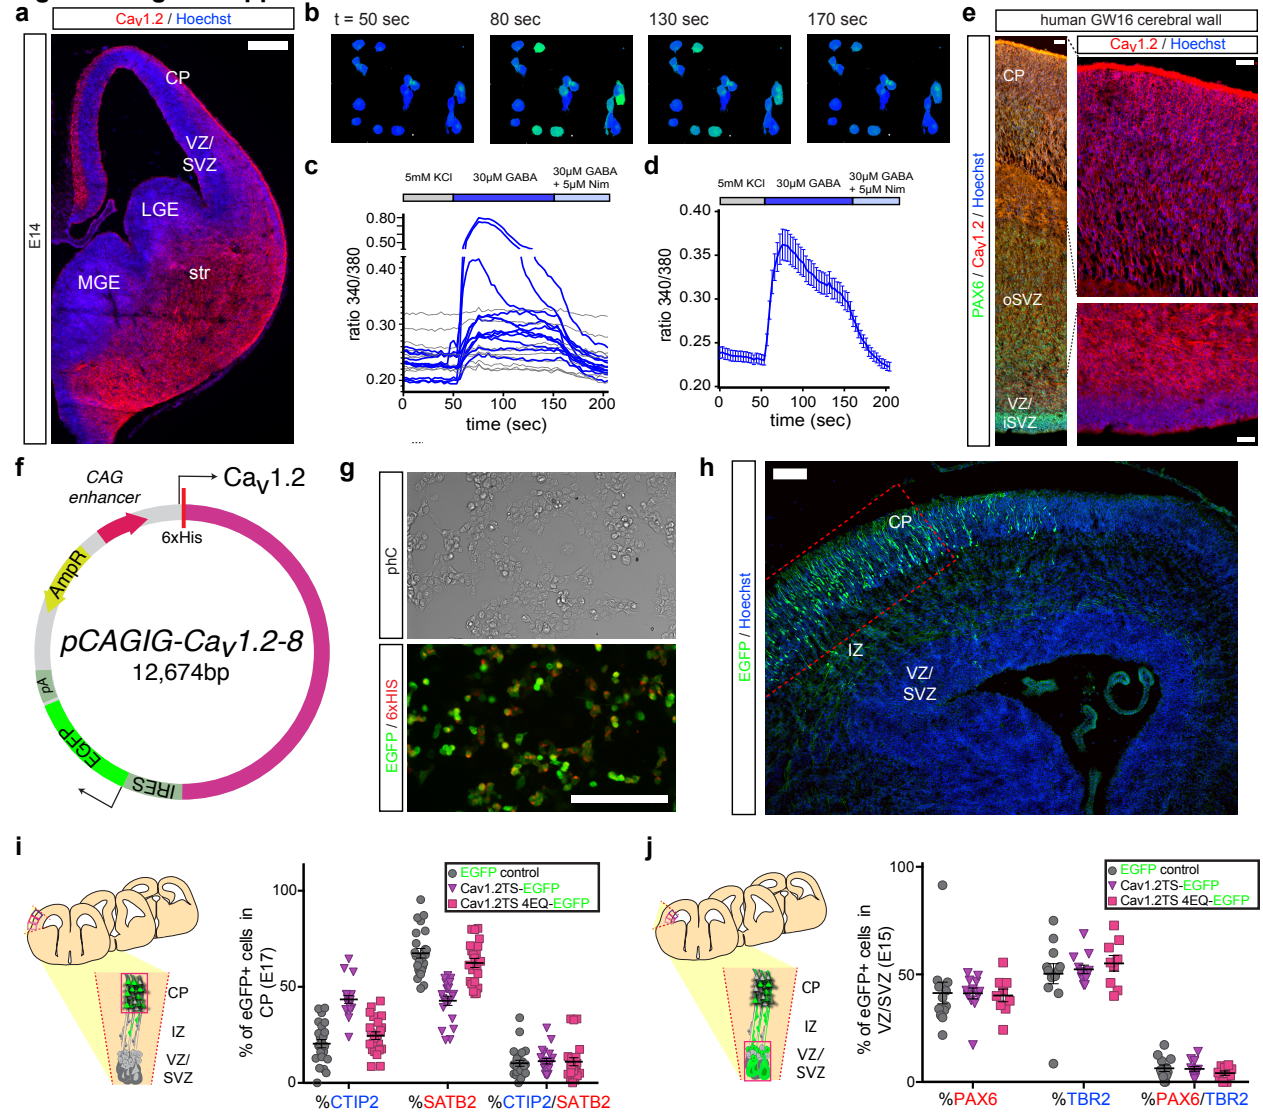

Supplement: supp [file elife-51037-supp-v1.zip]
